# Supplementary material
Source: Springer Nature journal article supplement (https://www.springermedizin.de/resource/supplementary/12916_2013_893_MOESM2_ESM.pdf/9598564)

**A**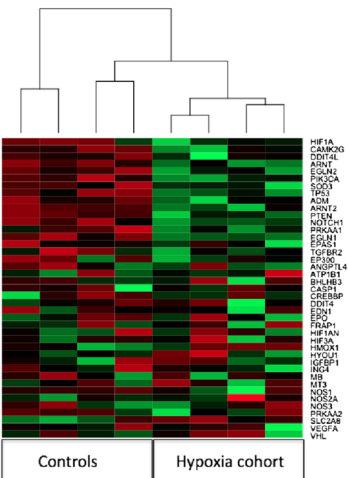**B** Fetal blood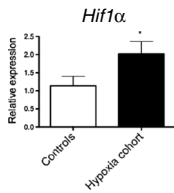**C** Placenta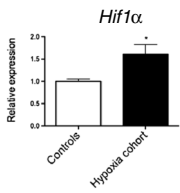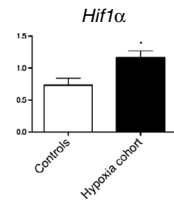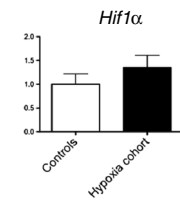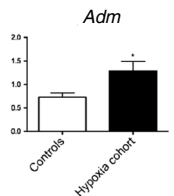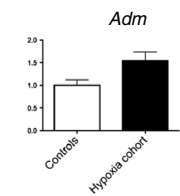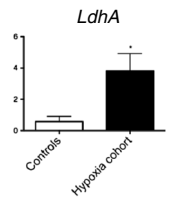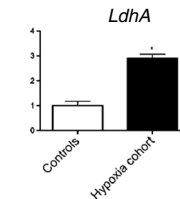

Supplement: MOESM2 [file 9598564]
